# Supplementary material
Source: publisher site journal article supplement (https://www.spandidos-publications.com/5910/downloadSupplementary)

Figure S1. A total of 16 antibodies were used to investigate the mechanism of tumorigenesis.

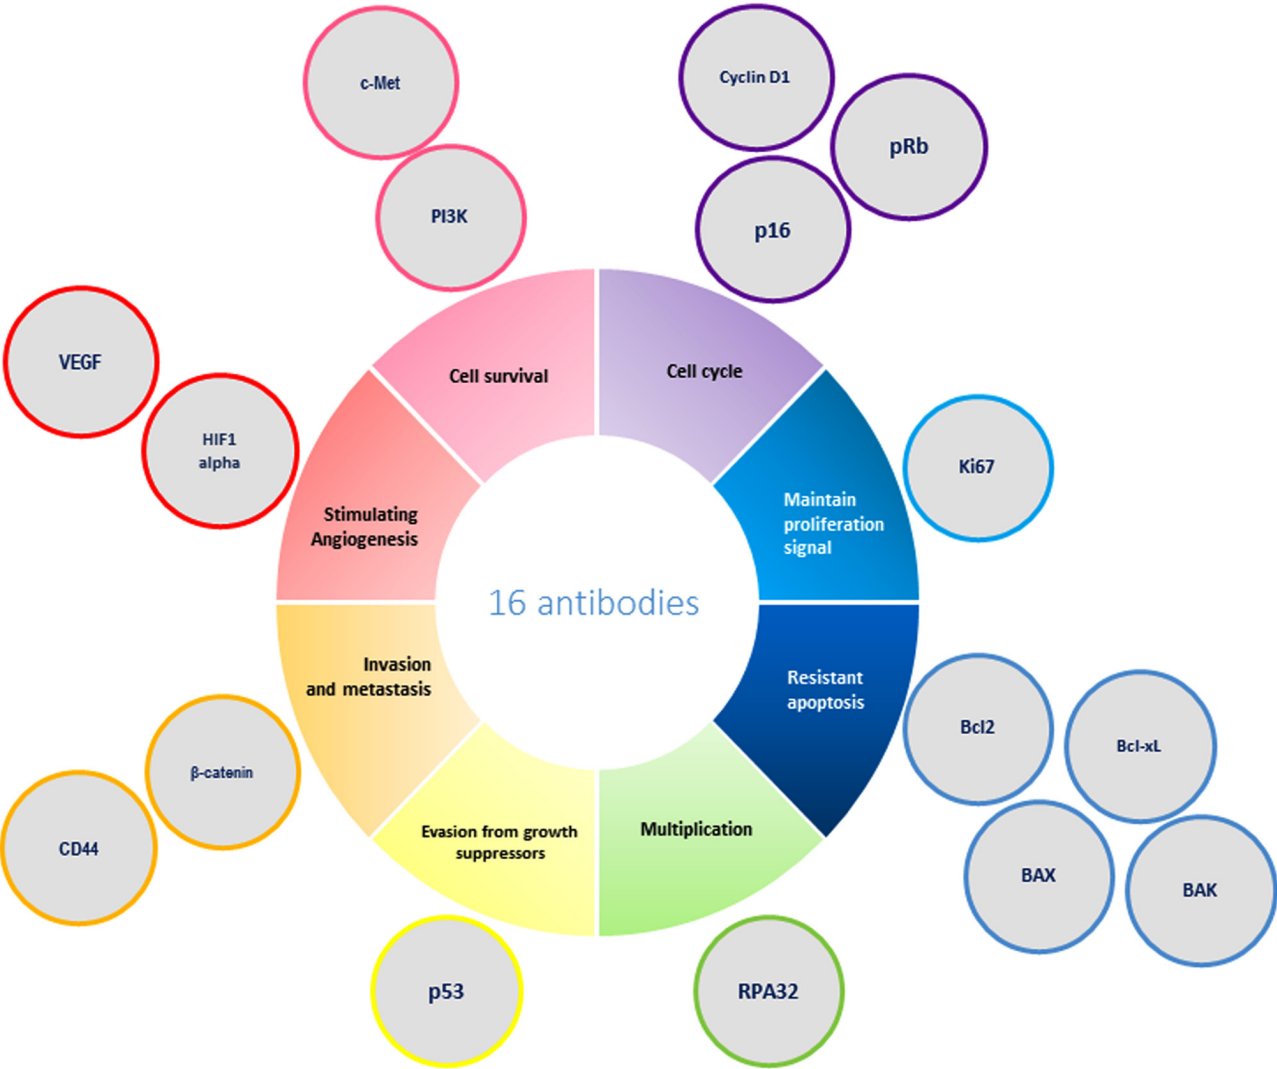

Supplement: Supplementary file 1 [file downloadSupplementary]
